# Supplementary material for: Clonally related tumor-reactive memory B cells reside in primary tumors and lymph nodes of ovarian cancer patients
Source: Research Square preprint supplement (doi:10.21203/rs.3.rs-5310643/v1), 2024-10-29
Supplement: Supplementary file 1 [file 0abded4e14a6d969bcc0abc9.xlsx]

## Sheet: HGSOC
Sample	Patient #	Sex	Age	Diagnosis	Stage	Sample	Chemo	Date of surgery	CA125 at diagnosis, u/mL	TAH/BSO debulking status	Carboplatin cycles	Taxane cycles	CA125 post chemotherapy	Post chemotherapy imaging response (RECIST)	Rercurrence (of evaluable patients)	Platinum sensitive	BRCA 1/2 pathogenic alteration	Outcome within reported follow-up period	Progression free survival, months	Overall survival, months
HGSOC TDLN1	1	F	75	HGSOC	IIIC	Left para-aortic	Naïve	2017-03-21	246.4	Optimal	5	5	21.4	Complete response	V	X	X	Dead of disease	15.9123	37.2164
HGSOC TDLN2	1	F	75	HGSOC	IIIC	Left para-aortic	Naïve	2017-03-21	246.4	Optimal	5	5	21.4	Complete response	V	X	X	Dead of disease	15.9123	37.2164
HGSOC PT	1	F	75	HGSOC	IIIC	Left para-aortic	Naïve	2017-03-21	246.4	Optimal	5	5	21.4	Complete response	V	X	X	Dead of disease	15.9123	37.2164
HGSOC TDLN	2	F	49	HGSOC	IIIC	External illiac	Naïve	2017-05-10	3828	Optimal	6	6	10.8	Complete response	V	V	V	Alive with disease	11.737	42.0822
HGSOC PT	2	F	49	HGSOC	IIIC	External illiac	Naïve	2017-05-10	3828	Optimal	6	6	10.8	Complete response	V	V	V		11.737	42.0822
HGSOC TDLN	3	F	53	HGSOC	IIC	Abdominal LN	Naïve	2024-03-05	451	Optimal	6	6	7	Complete response	X	V	V	No evidence of disease	5.9	5.9
HGSOC PT	3	F	53	HGSOC	IIC	Abdominal	Naïve	2024-03-05	451	Optimal	6	6	7	Complete response	X	V	V	No evidence of disease	5.9	5.9
HGSOC TDLN1	4	F	48	HGSOC	IIIC	Left common iliac	Naïve	2017-01-11	424.8	Optimal	6	6	12.3	Complete response	X	V	V	No evidence of disease	45.074	45.074
HGSOC TDLN2	4	F	49	HGSOC	IIIC	Left common iliac	Naïve	2017-01-11	424.8	Optimal	6	6	12.3	Complete response	X	V	V	No evidence of disease	45.074	45.074
HGSOC TDLN3	4	F	50	HGSOC	IIIC	Left common iliac	Naïve	2017-01-11	424.8	Optimal	6	6	12.3	Complete response	X	V	V	No evidence of disease	45.074	45.074
HGOCC TDLN	5	F	66	HGOCC	IIA	Right common illiac	Naïve	2022-12-07	416	Optimal	6	0	18	Complete response	V	V	X	Alive with disease	16.83	20.17
HGSOC TDLN	6	F	65	HGSOC	IIIC	Right para-cava	Naïve	2017-01-25	497	Optimal	6	6	6.6	Complete response	V	V	X	Alive with disease	15.5836	45.074
HGSOC TDLN	7	F	58	HGSOC	IIIA	Abdominal LN	Naïve	2022-11-15	41	Optimal	6	6	9	Complete response	X	V	V	No evidence of disease	22.5333	22.53
HGSOC TDLN1	8	F	51	HGSOC	III	Left para-aortic	Naïve	2017-02-08	572.1	Optimal	6	6	9	Progressive disease	V	X	V	Dead of disease	6.34521	19.4301
HGSOC TDLN2	8	F	51	HGSOC	III	Left para-aortic	Naïve	2017-02-08	572.1	Optimal	6	6	9	Progressive disease	V	X	V	Dead of disease	6.34521	19.4301
HGSOC TDLN	9	F	59	HGSOC	IIIC	Left para-aortic	Naïve	2017-11-07	1610	Suboptimal	6	6	15.4	Complete response	V	V	V	Alive with disease	22.126	36.0658
HGSOC TDLN	10	F	74	HGSOC	IIB	Right external iliac LN [FFPE]	Naïve	2020-12-15	53	Optimal	6	4	4	Complete response	X	V	V	No evidence of disease	43.2333	43.2333
HGSOC TDLN	11	F	49	HGSOC	IC3	Right common iliac [FFPE]	Naïve	2022-05-03	207	Optimal	6	6	11	Complete response	X	V	X	No evidence of disease	29.1333	29.1333
Exluded endometrial TDLN	12	F	61	HGSOC	IIIC	Left external [FFPE]	Naïve	2021-01-12	Suboptimal	6	6					X	No evidence of disease	42.5667	42.5667
HGSOC TDLN1	13	F	61	HGSOC	IIIB	Left common [FFPE]	Naïve	2022-08-09	370	Optimal	6	6	10	Complete response	V	V	X	Alive with disease	19.8333	24.3667
HGSOC TDLN2	13	F	61	HGSOC	IIIB	Right common [FFPE]	Naïve	2022-08-09	370	Optimal	6	6	10	Complete response	V	V	X	Alive with disease	19.8333	24.3667

## Sheet: IBD
Sampe	Patient #	Sex	Age	Diagnosis	Sample
IBD_LN	1	F	80	Chron's	Small intenstine
IBD_LN	1	F	80	Chron's	Small intenstine
IBD_LN	2	M	32	UC	Colon
IBD_LN	2	M	32	UC	Colon
IBD_LN	2	M	32	UC	Colon
IBD_LN	3	M	49	UC	Colon
IBD_LN	3	M	49	UC	Colon
